# Supplementary material for: Evaluation of stratospheric age of air from CF 4 , C 2 F 6 , C 3 F 8 , CHF 3 , HFC-125, HFC-227ea and SF 6 ; implications for the calculations of halocarbon lifetimes, fractional release factors and ozone depletion potentials
Source: Copernicus journal article supplement (doi:10.5194/acp-18-3369-2018), 2018-03-08
Supplement: Supplementary file 2 [file acp-18-3369-2018-supplement.zip]

Archive with 15 entries (14 files):
- acp-18-3369-2018-supplement-title-page.pdf
- Leedham Elvidge supplement/
- Leedham Elvidge supplement/strat_samples_K2011.na.txt
- Leedham Elvidge supplement/UEA_CapeGrim_C3F8.na.txt
- Leedham Elvidge supplement/strat_samples_K2010_K2011.sio-medusa7.txt
- Leedham Elvidge supplement/UEA_CapeGrim_HFC125.na.txt
- Leedham Elvidge supplement/UEA_CapeGrim_SF6.na.txt
- Leedham Elvidge supplement/strat_samples_B34.na.txt
- Leedham Elvidge supplement/strat_samples_B44.na.txt
- Leedham Elvidge supplement/strat_samples_K2010.na.txt
- Leedham Elvidge supplement/strat_samples_OB09.na.txt
- Leedham Elvidge supplement/UEA_CapeGrim_HFC227ea.na.txt
- Leedham Elvidge supplement/Supplementary Information.pdf
- Leedham Elvidge supplement/UEA_CapeGrim_CHF3.na.txt
- Leedham Elvidge supplement/UEA_CapeGrim_C2F6.na.txt
