# Supplementary material for: Evaluation of stratospheric age of air from CF 4 , C 2 F 6 , C 3 F 8 , CHF 3 , HFC-125, HFC-227ea and SF 6 ; implications for the calculations of halocarbon lifetimes, fractional release factors and ozone depletion potentials
Source: Copernicus journal article supplement (doi:10.5194/acp-18-3369-2018), 2018-03-08
Supplement: Supplementary file 2 [file acp-18-3369-2018-supplement.zip › acp-18-3369-2018-supplement-title-page.pdf]

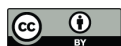

## *Supplement of*

# **Evaluation of stratospheric age of air from $\text{CF}_4$ , $\text{C}_2\text{F}_6$ , $\text{C}_3\text{F}_8$ , $\text{CHF}_3$ , HFC-125, HFC-227ea and $\text{SF}_6$ ; implications for the calculations of halocarbon lifetimes, fractional release factors and ozone depletion potentials**

Emma Leedham Elvidge et al.

Correspondence to: Emma Leedham Elvidge (e.leedham-elvidge@uea.ac.uk)

- acp-18-3369-2018-supplement-title-page.pdf
- Leedham Elvidge supplement
  - Supplementary Information.pdf
  - UEA\_CapeGrim\_C2F6.na.txt
  - UEA\_CapeGrim\_C3F8.na.txt
  - UEA\_CapeGrim\_CHF3.na.txt
  - UEA\_CapeGrim\_HFC125.na.txt
  - UEA\_CapeGrim\_HFC227ea.na.txt
  - UEA\_CapeGrim\_SF6.na.txt
  - strat\_samples\_B34.na.txt
  - strat\_samples\_B44.na.txt
  - strat\_samples\_K2010.na.txt
  - strat\_samples\_K2010\_K2011.sio-medusa7.txt
  - strat\_samples\_K2011.na.txt
  - strat\_samples\_OB09.na.txt

The copyright of individual parts of the supplement might differ from the CC BY 4.0 License.
