# Supplementary material for: Evaluation of stratospheric age of air from CF 4 , C 2 F 6 , C 3 F 8 , CHF 3 , HFC-125, HFC-227ea and SF 6 ; implications for the calculations of halocarbon lifetimes, fractional release factors and ozone depletion potentials
Source: Copernicus journal article supplement (doi:10.5194/acp-18-3369-2018), 2018-03-08
Supplement: Supplementary file 2 [file acp-18-3369-2018-supplement.zip › Leedham Elvidge supplement/strat_samples_B34.na.txt]

30	1001
file	compiled	by	Emma	Elvidge	e.leedham-elvidge@uea.ac.uk
School	of	Environmental	Sciences,	University	of	East	Anglia,	Norwich,	NR47TJ
UEA	instrument:	original	UEA	Autospec	SF6	from	U.	Frankfurt
Campaign:	B34	stratospheric	balloon	flight
1	1
1999	Feb	6	2015	Jul	10
0
time_sample_s	(sec)
7
1	1	1	1	1	1	1
99999	99999	99999	99999	99999	99999	99999
alt	(km)
C2F6_ppt	(ppt)
C3F8_ppt	(ppt)
CHF3_ppt	(ppt)
HFC227ea_ppt	(ppt)
HFC125_ppt	(ppt)
SF6_ppt	(ppt)
SF6_err	(ppt)
0
8
time	is	mean	sample	time	(UT	seconds)	from	0	hours	on	launch	date
All	mixing	ratio	data	are	from	University	of	East	Anglia	except	SF6	which	is	from	Goethe	University	Frankfurt
UEA	data	managed	by	Johannes	Laube	j.laube@uea.ac.uk
U.Frankfurt	data	managed	by	Andreas	Engel
all	data	on	NOAA/CMDL	scale
measured	by	gas	chromatography	with	mass	spectrometry	detection	(original	Autospec).
C2F6	average	percentage	analytical	precision:	1.80%
SF6	average	percentage	analytical	precision:	2.10%
time_sample_s	alt_km	C2F6_ppt	C3F8_ppt	CHF3_ppt	HFC227ea_ppt	HFC125_ppt	SF6_ppt
99999	25.05	1.95	99999	99999	99999	99999	2.81
99999	23.75	1.99	99999	99999	99999	99999	2.88
99999	22.53	2	99999	99999	99999	99999	2.82
99999	21.18	2.04	99999	99999	99999	99999	2.93
99999	19.37	2.09	99999	99999	99999	99999	3.07
99999	18.91	2.08	99999	99999	99999	99999	3.06
99999	17.87	2.08	99999	99999	99999	99999	2.95
99999	16.68	2.01	99999	99999	99999	99999	2.94
99999	15.65	2.11	99999	99999	99999	99999	3
99999	14.9	2.03	99999	99999	99999	99999	2.99
99999	10.73	2.25	99999	99999	99999	99999	3.68
99999	9.6	2.46	99999	99999	99999	99999	3.85
99999	8.09	2.47	99999	99999	99999	99999	4.16
