# Supplementary material for: Evaluation of stratospheric age of air from CF 4 , C 2 F 6 , C 3 F 8 , CHF 3 , HFC-125, HFC-227ea and SF 6 ; implications for the calculations of halocarbon lifetimes, fractional release factors and ozone depletion potentials
Source: Copernicus journal article supplement (doi:10.5194/acp-18-3369-2018), 2018-03-08
Supplement: Supplementary file 2 [file acp-18-3369-2018-supplement.zip › Leedham Elvidge supplement/strat_samples_B44.na.txt]

31	1001
file	compiled	by	Emma	Elvidge	e.leedham-elvidge@uea.ac.uk
School	of	Environmental	Sciences,	University	of	East	Anglia,	Norwich,	NR47TJ
samples	analysed	on	Autospec	mass	spec
Campaign:	B44	stratospheric	balloon	flight
1	1
2008	Jun	11	2015	Jul	10
0
time_sample_s	(sec)
13
1	1	1	1	1	1	1	1	1	1	1	1	1
99999	99999	99999	99999	99999	99999	99999	99999	99999	99999	99999	99999	99999
alt_km	(km)
C2F6_ppt	(ppt)
C2F6_err	(ppt)
C3F8_ppt	(ppt)
C3F8_err	(ppt)
CHF3_ppt	(ppt)
CHF3_err	(ppt)
HFC227ea_ppt	(ppt)
HFC227ea_err	(ppt)
HFC125_ppt	(ppt)
HFC125_err	(ppt)
SF6_ppt	(ppt)
SF6_err	(ppt)
0
4
time	is	mean	sample	time	(UT	seconds)	from	0	hours	on	launch	date
All	mixing	ratio	data	from	University	of	East	Anglia	managed	by	Johannes	Laube	j.laube@uea.ac.uk
all	data	on	NOAA/CMDL	scale
measured	by	gas	chromatography	with	mass	spectrometry	detection	(Autospec).
time_sample_s	alt_km	C2F6_ppt	C2F6_err	C3F8_ppt	C3F8_err	CHF3_ppt	CHF3_err	HFC227ea_ppt	HFC227ea_err	HFC125_ppt	HFC125_err	SF6_ppt	SF6_err
46060	33.511	99999	99999	0.385	0.013	99999	99999	0.226	0.014	99999	99999	5.289	0.073
47190	32.56	99999	99999	0.39	0.011	99999	99999	0.24	0.008	99999	99999	5.376	0.095
48240	14.845	99999	99999	0.478	0.008	99999	99999	0.454	0.006	99999	99999	6.386	0.086
4770	17.469	99999	99999	0.472	0.008	99999	99999	0.43	0.006	99999	99999	6.428	0.095
