# Supplementary material for: Evaluation of stratospheric age of air from CF 4 , C 2 F 6 , C 3 F 8 , CHF 3 , HFC-125, HFC-227ea and SF 6 ; implications for the calculations of halocarbon lifetimes, fractional release factors and ozone depletion potentials
Source: Copernicus journal article supplement (doi:10.5194/acp-18-3369-2018), 2018-03-08
Supplement: Supplementary file 2 [file acp-18-3369-2018-supplement.zip › Leedham Elvidge supplement/strat_samples_K2010.na.txt]

36	1001
file	compiled	by	Emma	Elvidge	e.leedham-elvidge@uea.ac.uk
School	of	Environmental	Sciences,	University	of	East	Anglia,	Norwich,	NR47TJ
samples	analysed	on	Autospec	mass	spec
Campaign:	K2010	Geophysica	high	altitude	aircraft	flight
1	1
2010	Jan	20	2015	Jul	10
0
time_sample_s	(sec)
14
1	1	1	1	1	1	1	1	1	1	1	1	1	1
99999	99999	99999	99999	99999	99999	99999	99999	99999	99999	99999	99999	99999	99999
alt_m	(m)
C2F6_ppt_AL
C2F6_err_AL
C3F8_ppt_GP
C3F8_err_GP
CHF3_ppt_AL
CHF3_err_AL
HFC227ea_ppt_GP
HFC227ea_err_GP
HFC125_ppt_GP
HFC125_err_GP
SF6_ppt_combi
SF6_err_combi
sample_name	no	unit
0
8
time	is	mean	sample	time	(UT	seconds)	from	0	hours	on	launch	date
All	mixing	ratio	data	from	University	of	East	Anglia	by	Johannes	Laube	j.laube@uea.ac.uk
all	data	on	NOAA/CMDL	scale
measured	by	gas	chromatography	with	mass	spectrometry	detection	(Autospec).
some	samples	were	analysed	on	two	GC	columns	to	allow	identification	of	a	larger	range	of	compounds	with	good	precision
mixing	ratios	derived	from	Agilent	GS	GasPro	column	marked	by	_GP	in	header
mixing	ratios	derived	from	KCl-passivated	Al-PLOT	column	marked	by	_AL	in	header
mixing	ratios	derived	from	a	combination	of	Gaspro	and	Al-PLOT	data	marked	by	_combi	in	header
time_sample_s	alt_m	C2F6_ppt_AL	C2F6_err_AL	C3F8_ppt_GP	C3F8_err_GP	CHF3_ppt_AL	CHF3_err_AL	HFC227ea_ppt_GP	HFC227ea_err_GP	HFC125_ppt_GP	HFC125_err_GP	SF6_ppt_combi	SF6_err_combi	sample_name
99999	18466.5	99999	99999	0.416300509	2.77839E-05	99999	99999	0.293934	5.99673E-06	4.262654661	0.003683026	5.54434	8.82822E-05	114
99999	16279.5	99999	99999	0.434126943	0.005413646	99999	99999	0.358017	0.003163156	5.20170869	0.051132254	5.9052	0.04186745	113
99999	13001.5	3.456842562	0.00029812	0.498634013	0.006218061	23.34043385	0.709315428	0.487546	0.004307573	7.072719143	0.069524092	6.538884078	0.046344449	112
99999	16496	99999	99999	0.442118446	0.005513301	99999	99999	0.39697	0.003507314	5.272137245	0.051824559	5.91981	0.041971034	241
99999	14156	99999	99999	0.481824226	0.00600844	99999	99999	0.537905	0.004752505	6.746109833	0.066313556	6.46123	0.045809663	240
99999	17743	99999	99999	0.417997279	0.005212506	99999	99999	0.310533	0.002743625	4.340912482	0.042670717	5.64241	0.040004288	102
99999	14209.5	99999	99999	0.47535365	0.005927751	99999	99999	0.463295	0.00409331	6.425523035	0.063162221	6.41054	0.045450275	236
99999	16610.5	99999	99999	0.431562458	0.005381666	99999	99999	0.380874	0.003365103	4.860710055	0.047780273	5.84333	0.041428796	237
99999	17667.5	3.23532647	0.016897422	0.433025701	0.001637263	20.32499196	0.731542441	0.309634	0.003333205	4.329370163	0.023582743	5.637448304	0.023698342	101
99999	16169.5	3.274064323	0.017099741	0.436636691	0.001650916	20.96029596	0.754408469	0.376455	0.004052532	4.929705152	0.026852859	5.894292175	0.024778518	239
99999	17658	99999	99999	0.424834558	3.61003E-05	99999	99999	0.301966	2.15645E-06	4.303821769	0.000965541	5.60215	0.000919911	104
99999	18504	99999	99999	0.416331617	0.00420741	99999	99999	0.287424	0.007690072	4.276163007	0.055323343	5.53349	0.03009238	105
99999	18340	99999	99999	0.420381782	0.004248341	99999	99999	0.294754	0.007886188	4.238430225	0.054835171	5.61414	0.030530973	106
99999	18068	99999	99999	0.420636598	0.004250916	99999	99999	0.299427	0.008011214	4.30477243	0.055693481	5.63553	0.030647296	107
99999	17717.5	99999	99999	0.428777013	0.004333182	99999	99999	0.311538	0.008335246	4.357053811	0.056369877	5.75093	0.031274868	108
99999	17694	99999	99999	0.418770477	0.004232057	99999	99999	0.30926	0.008274298	4.320421008	0.055895936	5.69593	0.030975765	109
99999	18666	99999	99999	0.421392041	0.00425855	99999	99999	0.304865	0.008156709	4.242785348	0.054891516	5.61385	0.030529396	110
99999	18829	99999	99999	0.406005644	0.004103057	99999	99999	0.291598	0.007801748	4.196436888	0.054291878	5.57966	0.030343463	111
99999	17706	99999	99999	0.424497929	0.004289938	99999	99999	0.314294	0.008408983	4.49325716	0.058132023	5.71067	0.031055925	103
99999	16787	99999	99999	0.437477187	0.004421106	99999	99999	0.373927	0.010004473	4.939082353	0.063899937	5.91952	0.032191699	238
99999	18203	99999	99999	0.421961002	3.01632E-05	99999	99999	0.313651	1.52474E-05	4.490579382	0.000263044	5.6681	0.000412613	155
99999	17700	99999	99999	0.425390657	0.006466667	99999	99999	0.293966	0.002405208	4.141014842	0.038337613	5.55968	0.007888974	253
99999	17299.5	99999	99999	0.418162539	0.006356788	99999	99999	0.292153	0.002390374	4.145449601	0.038378671	5.55047	0.007875905	176
99999	18352.5	99999	99999	0.414786811	0.006305471	99999	99999	0.295468	0.002417497	4.111504531	0.038064406	5.50878	0.007816749	170
99999	17733.5	99999	99999	0.411200033	0.007961946	99999	99999	0.291987	0.003121144	4.20740682	0.005421433	5.61134	0.011025033	150
99999	17731.5	99999	99999	0.410948389	0.007957073	99999	99999	0.279774	0.002990595	4.073169498	0.005248463	5.52725	0.010859815	249
99999	13547	99999	99999	0.464407096	0.008992179	99999	99999	0.42799	0.004574924	6.063823879	0.007813511	6.28975	0.012357958	160
99999	17737.5	99999	99999	0.421384141	0.008159138	99999	99999	0.297659	0.003181774	4.146484876	0.005342933	5.53708	0.010879129	254
99999	18549	99999	99999	0.407571187	0.007891681	99999	99999	0.289171	0.003091043	4.05579878	0.00522608	5.57129	0.010946344	145
99999	18091.5	99999	99999	0.409528989	0.00792959	99999	99999	0.297161	0.00317645	4.18643255	0.005394407	5.52756	0.010860424	132
99999	18637	99999	99999	0.410284248	0.002306518	99999	99999	0.289478	0.005332006	4.152338161	0.05298121	5.60052	0.08175634	135
99999	17334	99999	99999	0.431278353	0.002424542	99999	99999	0.349228	0.006432564	4.954556726	0.063217011	5.83928	0.085241757	130
99999	14512.5	3.395524365	0.005568106	0.462970776	0.002602709	22.38456981	0.198600457	0.432493	0.007966254	6.151324514	0.078487012	6.282271251	0.093243515	140
99999	9271.5	99999	99999	0.514929968	0.002894811	99999	99999	0.578466	0.010654986	8.498113449	0.108430555	6.9472	0.101415163	133
99999	17450	3.244253745	0.016944047	0.435329049	0.002447314	20.62437057	0.398391534	0.332259	0.006120005	4.712566204	0.060129365	5.793300094	0.086881476	182
99999	14334.5	99999	99999	0.456046496	3.32345E-06	99999	99999	0.421996	5.41402E-07	5.998969881	0.000593584	6.19042	0.00066049	128
99999	15919	3.3170075	0.017324024	0.451631119	0.003627173	21.11276821	0.407825688	0.378328	0.001015505	5.422849374	0.008205046	6.064711673	0.09111603	137
99999	15452.5	99999	99999	0.452017294	0.003630275	99999	99999	0.390861	0.001049146	5.521996852	0.008355061	6.116	0.088795778	134
99999	10951.5	99999	99999	0.501733173	0.004029557	99999	99999	0.534575	0.001434902	7.624500736	0.011536257	6.69889	0.097258526	174
99999	18817.5	99999	99999	0.421830557	0.005705318	99999	99999	0.306294	0.006307807	4.44744127	0.027107309	5.62544	0.061874929	179
99999	18814	99999	99999	0.404832189	0.005475412	99999	99999	0.281063	0.005788201	3.906808791	0.023812135	5.42607	0.059682033	142
99999	17735.5	99999	99999	0.415928304	0.005625489	99999	99999	0.300973	0.006198227	4.20053817	0.025602426	5.49518	0.060442183	243
99999	14729.5	99999	99999	0.446554871	0.006039718	99999	99999	0.385229	0.007933392	5.501440673	0.033531472	6.02557	0.06627601	183
99999	18091.5	99999	99999	0.405512496	0.005484614	99999	99999	0.276068	0.005685334	4.036576513	0.024603074	5.54959	0.061040645	184
99999	17767.5	99999	99999	0.407113593	0.005506269	99999	99999	0.276462	0.005693448	3.934606916	0.023981566	5.43916	0.059826012	226
99999	17766.5	99999	99999	0.413198609	0.005588569	99999	99999	0.282843	0.005824858	3.97001033	0.024197351	5.57907	0.0613649	252
99999	17684	99999	99999	0.419807864	0.005677961	99999	99999	0.288743	0.005946363	4.154911416	0.02532433	5.52676	0.060789535	177
99999	17705.5	3.178496095	0.00055621	0.413242595	0.005589164	19.55011529	0.02174418	0.285611	0.005881863	3.92780297	0.023940096	5.502331933	0.060852926	246
99999	14979	99999	99999	0.457874092	0.006192812	99999	99999	0.415271	0.008552076	5.940138396	0.03620535	6.18497	0.068029271	180
99999	17428.5	99999	99999	0.418599353	1.1328E-05	99999	99999	0.31546	1.1576E-06	4.439676709	0.000863159	5.66309	0.001598393	149
99999	18469.5	99999	99999	0.414199407	0.001269281	99999	99999	0.283439	0.000511783	4.10145042	0.004131776	5.52548	0.054705448	139
99999	18146	99999	99999	0.411604084	0.001261328	99999	99999	0.292772	0.000528634	4.179160739	0.004210061	5.50908	0.054543078	129
99999	18714.5	99999	99999	0.411776358	0.001261856	99999	99999	0.286522	0.000517349	3.969014874	0.003998361	5.50621	0.054514663	136
99999	17096	99999	99999	0.430417548	3.88454E-05	99999	99999	0.324767	2.07334E-05	4.662634101	0.00189281	5.81887	0.000796281	131
99999	18519.5	99999	99999	0.412643964	0.006175347	99999	99999	0.288117	0.008116167	4.075150456	0.031194483	5.59263	0.071386337	153
99999	18306.5	3.21746397	0.01680413	0.415285446	0.006214877	20.4377152	0.394785998	0.314313	0.0088541	4.449193274	0.034057708	5.696385929	0.0758073	173
99999	18200	99999	99999	0.418891514	0.006268843	99999	99999	0.302322	0.008516317	4.35782529	0.033358304	5.63034	0.071867681	178
99999	18159.5	99999	99999	0.40824522	0.006109518	99999	99999	0.284856	0.008024306	4.161352021	0.03185434	5.59656	0.071436501	141
99999	18279.5	99999	99999	0.407575751	0.006099499	99999	99999	0.282438	0.007956191	4.080650354	0.031236584	5.55528	0.070909588	143
99999	18373	3.193548108	0.016679222	0.410945965	0.006149935	19.63978171	0.379372682	0.289198	0.008146618	4.070277696	0.031157183	5.559781732	0.073706871	144
99999	17728	3.111303318	0.01625658	99999	99999	18.9172	0.365414901	99999	99999	99999	99999	5.221790085	0.015386133	274
99999	18181.5	3.308489369	0.017286878	99999	99999	20.9787	0.405235954	99999	99999	99999	99999	5.878153154	0.017320123	167
99999	10512.5	3.52046513	0.018394453	99999	99999	23.8698	0.461082011	99999	99999	99999	99999	6.797200262	0.020028118	231
99999	17682	3.128804979	0.016348026	99999	99999	19.2164	0.371194411	99999	99999	99999	99999	5.249945437	0.015469094	259
99999	17145	3.288064044	0.017180155	99999	99999	20.3202	0.392516011	99999	99999	99999	99999	99999	99999	272
