# Supplementary material for: Evaluation of stratospheric age of air from CF 4 , C 2 F 6 , C 3 F 8 , CHF 3 , HFC-125, HFC-227ea and SF 6 ; implications for the calculations of halocarbon lifetimes, fractional release factors and ozone depletion potentials
Source: Copernicus journal article supplement (doi:10.5194/acp-18-3369-2018), 2018-03-08
Supplement: Supplementary file 2 [file acp-18-3369-2018-supplement.zip › Leedham Elvidge supplement/strat_samples_K2010_K2011.sio-medusa7.txt]

% Leedham-Elvidge et al., 2018, Evaluation of stratospheric age-of-air from CF4, C2F6, C3F8, CHF3, HFC-125, HFC-227ea and SF6; implications for the calculations of halocarbon lifetimes, fractional release factors and ozone depletion potentials, 
% Atmospheric Chemistry and Physics, acp-2017-748, Supporting Information
% K2010 and K2011 polar stratospheric sample subset measurements results from the SIO Medusa 7 GC/MS system for CF4, C2F6, and C3F8.
% Sample collection and campaign details are discussed in Laube et al. (2013). 
% See main text and  Table 2 for a description of the analytical method.
% Calibration scales are: CF4 (PFC-14): SIO-05; C2F6 (PFC-116): SIO-07; C3F8 (PFC-218): SIO-07.
% All mole fractions (C) and precisions (%s, stdv 1 sigma) are reported as dry air mole fractions in ppt.
% "%s calibration propagation" is an estimate of the calibration propagation uncertainty,
% Blank levels are estimated from zero air measurements,
% Detection limits are estimated based on three times baseline noise in height units related to standard peak height and standard concentration.
% Alti. is the sampling altitude, 
% Tank names are composed as UEA10(K2010)/UEA11(K2011)-Uxxx(tank_serial)-xxxxx(altitude),
% Standard is the standard used at SIO to measure these samples.
% Date is the measurement date (not the sampling date), 
% C is the mean mole fraction (ppt), %s the standard deviation,
% n is the number of measurements that contribute to the mean mole fraction (C) and the the standard deviation (%s).
% Expanded uncertainty (es) includes calibration scale propagation uncertainty as 
% es = C * %s/100 + C * (%s calibration propagation)/100     and    %es = es / C * 100.
%
% For use or updates of these results, please contact Emma Elvidge <E.Leedham-Elvidge at uea.ac.uk> and Jens Mühle (jmuhle at ucsd.edu).
%
                                                CF4       CF4       CF4                  exp. uncertainty       %s calibration propagation: 0.0477
Alti. Tank                Standard           Date           C        %s         n         %es       es          Blank: 0.0000 Detection limit: 0.2023
15919 UEA10-U137-15919    T-007B             160404    76.062     0.251        10         0.299     0.227 
17145 UEA10-U272-17145    T-007B             160405    75.213     0.605        12         0.653     0.491 
10513 UEA10-U231-10513    T-007B             160406    77.903     0.342        10         0.390     0.304 
17728 UEA10-U274-17728    T-007B             160407    74.452     0.211        10         0.259     0.193 
17682 UEA10-U259-17682    T-007B             160408    74.472     0.276        10         0.324     0.241 
18373 UEA10-U144-18373    T-007B             160411    75.121     0.442         9         0.490     0.368 
17668 UEA10-U101-17668    T-007B             160412    75.100     0.197         7         0.245     0.184 
16170 UEA10-U239-16170    T-007B             160413    75.848     0.194         7         0.242     0.183 
13002 UEA10-U112-13002    T-007B             160414    77.557     0.112         4         0.160     0.124 
14513 UEA10-U140-14513    T-007B             160415    76.653     0.271         6         0.319     0.244 

                                                CF4       CF4       CF4                  exp. uncertainty       %s calibration propagation: 0.0477
Alti. Tank                Standard           Date           C        %s         n         %es       es          Blank: 0.0000 Detection limit: 0.2023
18014 UEA11-U294-18014    T-007B             160418    76.570     0.495         8         0.543     0.416 
18589 UEA11-U221-18589    T-007B:U294        160425    75.319     0.127         3         0.175     0.132 
18576 UEA11-U298-18576    T-007B:U294        160426    75.636     0.188         4         0.236     0.178 
17099 UEA11-U215-17099    T-007B:U294        160427    76.720     0.256         3         0.304     0.233 
14023 UEA11-U202-14023    T-007B:U294        160428    77.739     0.214         4         0.262     0.203 
18467 UEA11-U292-18467    T-007B:U294        160429    75.799     0.313         4         0.361     0.273 
17153 UEA11-U204-17153    T-007B:U294        160503    77.552     0.457         4         0.505     0.391 
17984 UEA11-U189-17984    T-007B:U294        160504    77.244     0.494         4         0.542     0.418 
18035 UEA11-U293-18035    T-007B:U294        160505    76.267     0.314         4         0.362     0.276 
14171 UEA11-U243-14171    T-007B:U294        160506    78.087     0.334         3         0.382     0.298 

                                            PFC-116   PFC-116   PFC-116                  exp. uncertainty       %s calibration propagation: 0.1761
Alti. Tank                Standard           Date           C        %s         n         %es       es          Blank: 0.0000 Detection limit: 0.0761
15919 UEA10-U137-15919    T-007B             160404     3.787     1.988        11         2.164     0.082 
17145 UEA10-U272-17145    T-007B             160405     3.711     1.843        12         2.019     0.075 
10513 UEA10-U231-10513    T-007B             160406     4.020     2.276        10         2.452     0.099 
17728 UEA10-U274-17728    T-007B             160407     3.511     0.749         8         0.925     0.032 
17682 UEA10-U259-17682    T-007B             160408     3.551     2.337        10         2.513     0.089 
18373 UEA10-U144-18373    T-007B             160411     3.630     1.528         9         1.704     0.062 
17668 UEA10-U101-17668    T-007B             160412     3.631     1.640         8         1.816     0.066 
16170 UEA10-U239-16170    T-007B             160413     3.721     1.717         7         1.893     0.070 
13002 UEA10-U112-13002    T-007B             160414     3.927     1.982         5         2.158     0.085 
14513 UEA10-U140-14513    T-007B             160415     3.794     1.899         6         2.075     0.079 

                                            PFC-116   PFC-116   PFC-116                  exp. uncertainty       %s calibration propagation: 0.1761
Alti. Tank                Standard           Date           C        %s         n         %es       es          Blank: 0.0000 Detection limit: 0.0761
18014 UEA11-U294-18014    T-007B             160418     3.952     1.881         8         2.057     0.081 
18589 UEA11-U221-18589    T-007B:U294        160425     3.759     3.007         3         3.183     0.120 
18576 UEA11-U298-18576    T-007B:U294        160426     3.756     3.953         4         4.129     0.155 
17099 UEA11-U215-17099    T-007B:U294        160427     3.953     0.820         3         0.996     0.039 
14023 UEA11-U202-14023    T-007B:U294        160428     4.058     2.788         4         2.964     0.120 
18467 UEA11-U292-18467    T-007B:U294        160429     3.751     3.482         4         3.658     0.137 
17153 UEA11-U204-17153    T-007B:U294        160503     3.927     2.359         4         2.535     0.100 
17984 UEA11-U189-17984    T-007B:U294        160504     3.929     0.932         4         1.108     0.044 
18035 UEA11-U293-18035    T-007B:U294        160505     3.736     2.015         4         2.191     0.082 
14171 UEA11-U243-14171    T-007B:U294        160506     4.023     2.806         4         2.982     0.120 

                                                SF6       SF6       SF6                  exp. uncertainty       %s calibration propagation: 0.1671
Alti. Tank                Standard           Date           C        %s         n         %es       es          Blank: 0.0000 Detection limit: 0.0514
15919 UEA10-U137-15919    T-007B             160404     5.975     0.762        10         0.929     0.056 
17145 UEA10-U272-17145    T-007B             160405     5.715     0.565        10         0.732     0.042 
10513 UEA10-U231-10513    T-007B             160406     6.725     1.214        10         1.381     0.093 
17728 UEA10-U274-17728    T-007B             160407     5.172     1.876        10         2.043     0.106 
17682 UEA10-U259-17682    T-007B             160408     5.267     1.600        10         1.767     0.093 
18373 UEA10-U144-18373    T-007B             160411     5.462     2.090         9         2.257     0.123 
17668 UEA10-U101-17668    T-007B             160412     5.557     0.963         7         1.130     0.063 
16170 UEA10-U239-16170    T-007B             160413     5.888     0.842         7         1.009     0.059 
13002 UEA10-U112-13002    T-007B             160414     6.424     0.956         5         1.123     0.072 
14513 UEA10-U140-14513    T-007B             160415     6.257     1.119         6         1.286     0.080 

                                                SF6       SF6       SF6                  exp. uncertainty       %s calibration propagation: 0.1671
Alti. Tank                Standard           Date           C        %s         n         %es       es          Blank: 0.0000 Detection limit: 0.0514
18014 UEA11-U294-18014    T-007B             160418     6.164     1.538         8         1.705     0.105 
18589 UEA11-U221-18589    T-007B:U294        160425     5.679     0.646         3         0.813     0.046 
18576 UEA11-U298-18576    T-007B:U294        160426     5.653     1.456         4         1.623     0.092 
17099 UEA11-U215-17099    T-007B:U294        160427     6.172     0.678         3         0.845     0.052 
14023 UEA11-U202-14023    T-007B:U294        160428     6.629     0.620         4         0.787     0.052 
18467 UEA11-U292-18467    T-007B:U294        160429     5.602     1.091         4         1.258     0.070 
17153 UEA11-U204-17153    T-007B:U294        160503     6.548     1.241         4         1.408     0.092 
17984 UEA11-U189-17984    T-007B:U294        160504     6.328     1.237         4         1.404     0.089 
18035 UEA11-U293-18035    T-007B:U294        160505     5.945     1.449         4         1.616     0.096 
14171 UEA11-U243-14171    T-007B:U294        160506     6.768     2.535         4         2.702     0.183 
