# Supplementary material for: Evaluation of stratospheric age of air from CF 4 , C 2 F 6 , C 3 F 8 , CHF 3 , HFC-125, HFC-227ea and SF 6 ; implications for the calculations of halocarbon lifetimes, fractional release factors and ozone depletion potentials
Source: Copernicus journal article supplement (doi:10.5194/acp-18-3369-2018), 2018-03-08
Supplement: Supplementary file 2 [file acp-18-3369-2018-supplement.zip › Leedham Elvidge supplement/strat_samples_K2011.na.txt]

47	1001
file	compiled	by	Emma	Elvidge	e.leedham-elvidge@uea.ac.uk
School	of	Environmental	Sciences,	University	of	East	Anglia,	Norwich,	NR47TJ
samples	analysed	on	Autospec	mass	spec
Campaign:	K2011	Geophysica	high	altitude	aircraft	flight
1	1
2011	Dec	11	2015	Jul	10
0
time_sample_s	(sec)
26
1	1	1	1	1	1	1	1	1	1	1	1	1	1	1	1	1	1	1	1	1	1	1	1	1	1
99999	99999	99999	99999	99999	99999	99999	99999	99999	99999	99999	99999	99999	99999	99999	99999	99999	99999	99999	99999	99999	99999	99999	99999	99999	99999
alt_m	(m)
C2F6_ppt_GP	(ppt)
C2F6_err_GP	(ppt)
C3F8_ppt_GP	(ppt)
C3F8_err_GP	(ppt)
CHF3_ppt_GP	(ppt)
CHF3_err_GP	(ppt)
HFC227ea_ppt_GP	(ppt)
HFC227ea_err_GP	(ppt)
HFC125_ppt_GP	(ppt)
HFC125_err_GP	(ppt)
SF6_ppt_GP	(ppt)
SF6_err_GP	(ppt)
C2F6_ppt_AL	(ppt)
C2F6_err_AL	(ppt)
C3F8_ppt_AL	(ppt)
C3F8_err_AL	(ppt)
CHF3_ppt_AL	(ppt)
CHF3_err_AL	(ppt)
HFC227ea_ppt_AL	(ppt)
HFC227ea_err_AL	(ppt)
HFC125_ppt_AL	(ppt)
HFC125_err_AL	(ppt)
SF6_ppt_AL	(ppt)
SF6_err_AL	(ppt)
sample	name	no	unit
0
7
time	is	mean	sample	time	(UT	seconds)	from	0	hours	on	launch	date
All	mixing	ratio	data	from	University	of	East	Anglia	by	Johannes	Laube	j.laube@uea.ac.uk
all	data	on	NOAA/CMDL	scale
measured	by	gas	chromatography	with	mass	spectrometry	detection	(Autospec).
some	samples	were	analysed	on	two	GC	columns	to	allow	identification	of	a	larger	range	of	compounds
mixing	ratios	derived	from	Agilent	GS	GasPro	column	marked	by	_GP'	in	header
mixing	ratios	derived	from	KCl-passivated	Al-PLOT	column	marked	by	_AL'	in	header
time_sample_s	alt_m	C2F6_ppt_GP	C2F6_err_GP	C3F8_ppt_GP	C3F8_err_GP	CHF3_ppt_GP	CHF3_err_GP	HFC227ea_ppt_GP	HFC227ea_err_GP	HFC125_ppt_GP	HFC125_err_GP	SF6_ppt_GP	SF6_err_GP	C2F6_ppt_AL	C2F6_err_AL	C3F8_ppt_AL	C3F8_err_AL	CHF3_ppt_AL	CHF3_err_AL	HFC227ea_ppt_AL	HFC227ea_err_AL	HFC125_ppt_AL	HFC125_err_AL	SF6_ppt_AL	SF6_err_AL	sample_name
99999	99999	99999	99999	99999	99999	99999	99999	99999	99999	99999	99999	99999	99999	3.342	0.070	99999	99999	99999	99999	99999	99999	99999	99999	5.828	0.115	160
99999	99999	99999	99999	99999	99999	99999	99999	99999	99999	99999	99999	99999	99999	3.241	0.016	99999	99999	99999	99999	99999	99999	99999	99999	5.713	0.021	164
99999	99999	99999	99999	99999	99999	99999	99999	99999	99999	99999	99999	99999	99999	3.354	0.043	99999	99999	99999	99999	99999	99999	99999	99999	5.864	0.042	171
99999	99999	99999	99999	99999	99999	99999	99999	99999	99999	99999	99999	99999	99999	3.439	0.073	99999	99999	99999	99999	99999	99999	99999	99999	6.400	0.126	172
99999	99999	99999	99999	99999	99999	22.669	0.210	0.498	0.000	99999	99999	6.474	0.003	3.425	0.017	99999	99999	99999	99999	99999	99999	99999	99999	6.512	0.023	189
99999	99999	99999	99999	99999	99999	21.256	0.217	0.387	0.006	99999	99999	6.006	0.108	99999	99999	99999	99999	99999	99999	99999	99999	99999	99999	99999	99999	190
99999	99999	99999	99999	99999	99999	22.036	0.096	0.453	0.007	99999	99999	6.369	0.114	99999	99999	99999	99999	99999	99999	99999	99999	99999	99999	99999	99999	194
99999	99999	99999	99999	99999	99999	21.609	0.341	0.408	0.003	99999	99999	6.080	0.021	99999	99999	99999	99999	99999	99999	99999	99999	99999	99999	99999	99999	200
99999	99999	99999	99999	99999	99999	22.871	0.100	0.510	0.008	99999	99999	6.785	0.122	3.553	0.058	99999	99999	99999	99999	99999	99999	99999	99999	6.778	0.078	202
99999	99999	99999	99999	99999	99999	22.420	0.353	0.467	0.003	99999	99999	6.426	0.022	99999	99999	99999	99999	99999	99999	99999	99999	99999	99999	99999	99999	203
99999	99999	99999	99999	99999	99999	22.261	0.014	0.477	0.000	99999	99999	6.546	0.002	3.521	0.058	99999	99999	99999	99999	99999	99999	99999	99999	6.749	0.077	204
99999	99999	99999	99999	99999	99999	22.082	0.096	0.448	0.007	99999	99999	6.320	0.113	3.500	0.057	99999	99999	99999	99999	99999	99999	99999	99999	6.469	0.074	207
99999	99999	99999	99999	99999	99999	21.462	0.219	0.423	0.006	99999	99999	6.185	0.111	3.394	0.072	99999	99999	99999	99999	99999	99999	99999	99999	6.239	0.123	215
99999	99999	99999	99999	99999	99999	21.250	0.093	0.338	0.005	99999	99999	5.721	0.103	3.279	0.017	99999	99999	99999	99999	99999	99999	99999	99999	5.815	0.021	221
99999	99999	99999	99999	99999	99999	99999	99999	99999	99999	99999	99999	99999	99999	3.343	0.070	99999	99999	99999	99999	99999	99999	99999	99999	6.126	0.120	230
99999	99999	99999	99999	99999	99999	99999	99999	99999	99999	99999	99999	99999	99999	3.330	0.017	99999	99999	99999	99999	99999	99999	99999	99999	6.100	0.022	232
99999	99999	99999	99999	99999	99999	99999	99999	99999	99999	99999	99999	99999	99999	3.451	0.073	99999	99999	99999	99999	99999	99999	99999	99999	6.294	0.124	235
99999	99999	99999	99999	99999	99999	99999	99999	99999	99999	99999	99999	99999	99999	3.607	0.059	99999	99999	99999	99999	99999	99999	99999	99999	7.064	0.081	243
99999	99999	99999	99999	99999	99999	99999	99999	99999	99999	99999	99999	99999	99999	3.408	0.056	99999	99999	99999	99999	99999	99999	99999	99999	6.372	0.073	248
99999	99999	99999	99999	99999	99999	99999	99999	99999	99999	99999	99999	99999	99999	3.260	0.042	99999	99999	99999	99999	99999	99999	99999	99999	5.681	0.041	266
99999	99999	99999	99999	99999	99999	99999	99999	99999	99999	99999	99999	99999	99999	3.350	0.071	99999	99999	99999	99999	99999	99999	99999	99999	6.097	0.120	286
99999	99999	99999	99999	99999	99999	99999	99999	99999	99999	99999	99999	99999	99999	3.450	0.045	99999	99999	99999	99999	99999	99999	99999	99999	6.263	0.045	288
99999	99999	99999	99999	99999	99999	22.522	0.230	0.484	0.007	99999	99999	6.520	0.117	99999	99999	99999	99999	99999	99999	99999	99999	99999	99999	99999	99999	289
99999	99999	99999	99999	99999	99999	99999	99999	99999	99999	99999	99999	99999	99999	3.253	0.069	99999	99999	99999	99999	99999	99999	99999	99999	5.678	0.112	292
99999	99999	99999	99999	99999	99999	99999	99999	99999	99999	99999	99999	99999	99999	3.352	0.071	99999	99999	99999	99999	99999	99999	99999	99999	5.948	0.117	293
99999	99999	99999	99999	99999	99999	21.998	0.054	0.427	0.013	99999	99999	6.096	0.013	3.455	0.018	99999	99999	99999	99999	99999	99999	99999	99999	6.312	0.023	294
99999	99999	99999	99999	99999	99999	99999	99999	99999	99999	99999	99999	99999	99999	3.317	0.043	99999	99999	99999	99999	99999	99999	99999	99999	5.793	0.042	298
99999	99999	99999	99999	99999	99999	99999	99999	99999	99999	99999	99999	99999	99999	3.453	0.045	99999	99999	99999	99999	99999	99999	99999	99999	6.457	0.046	299
