# Supplementary material for: Evaluation of stratospheric age of air from CF 4 , C 2 F 6 , C 3 F 8 , CHF 3 , HFC-125, HFC-227ea and SF 6 ; implications for the calculations of halocarbon lifetimes, fractional release factors and ozone depletion potentials
Source: Copernicus journal article supplement (doi:10.5194/acp-18-3369-2018), 2018-03-08
Supplement: Supplementary file 2 [file acp-18-3369-2018-supplement.zip › Leedham Elvidge supplement/strat_samples_OB09.na.txt]

31	1001
file	compiled	by	Emma	Elvidge	e.leedham-elvidge@uea.ac.uk
School	of	Environmental	Sciences,	University	of	East	Anglia,	Norwich,	NR47TJ
samples	analysed	on	Autospec	mass	spec
Campaign:	OB09	Geophsycia	high	aircraft	flight
1	1
2009	Oct	30	2015	Jul	10
0
time_sample_s	(sec)
13
1	1	1	1	1	1	1	1	1	1	1	1	1
99999	99999	99999	99999	99999	99999	99999	99999	99999	99999	99999	99999	99999
alt_m	(m)
C2F6_ppt	(ppt)
C2F6_err	(ppt)
C3F8_ppt	(ppt)
C3F8_err	(ppt)
CHF3_ppt	(ppt)
CHF3_err	(ppt)
HFC227ea_ppt	(ppt)
HFC227ea_err	(ppt)
HFC125_ppt	(ppt)
HFC125_err	(ppt)
SF6_ppt	(ppt)
SF6_err	(ppt)
0
4
time	is	mean	sample	time	(UT	seconds)	from	0	hours	on	launch	date
All	mixing	ratio	data	from	University	of	East	Anglia	analysed	by	Johannes	Laube	j.laube@uea.ac.uk
all	data	on	NOAA/CMDL	scale
measured	by	gas	chromatography	with	mass	spectrometry	detection	(Autospec).
time_sample_s	alt_m	C2F6_ppt	C2F6_err	C3F8_ppt	C3F8_err	CHF3_ppt	CHF3_err	HFC227ea_ppt	HFC227ea_err	HFC125_ppt	HFC125_err	SF6_ppt	SF6_err
99999	18304.56	99999	99999	0.541	0.001	99999	99999	0.593	0.003	8.156	0.062	6.918	0.02
99999	18776.5	99999	99999	0.468	0.001	99999	99999	0.424	0.002	5.98	0.045	6.296	0.018
99999	18788.5	99999	99999	0.444	0.002	99999	99999	0.373	0.004	5.151	0.039	5.979	0.016
99999	18767.745	99999	99999	0.429	0.001	99999	99999	0.341	0.002	4.756	0.036	5.905	0.017
99999	19257.87	99999	99999	0.473	0.004	99999	99999	0.414	0.004	5.795	0.07	6.195	0.02
99999	17770.935	99999	99999	0.484	0.004	99999	99999	0.438	0.004	6.04	0.073	6.253	0.02
99999	18398.45	99999	99999	0.465	0.009	99999	99999	0.39	0.009	5.472	0.034	6.02	0.008
99999	17863.19	99999	99999	0.45	0.004	99999	99999	0.385	0.003	5.449	0.066	6.014	0.019
99999	18299	99999	99999	0.461	0.004	99999	99999	0.401	0.003	5.578	0.067	6.184	0.02
99999	18576.31	99999	99999	0.454	0.004	99999	99999	0.399	0.003	5.342	0.065	6.111	0.019
99999	19818	99999	99999	0.469	0.004	99999	99999	0.425	0.004	6.08	0.074	6.355	0.02
99999	18287	99999	99999	0.469	0.003	99999	99999	0.43	0.004	6.063	0.025	6.355	0.065
99999	19519.5	99999	99999	0.476	0.003	99999	99999	0.426	0.004	5.806	0.024	6.24	0.064
99999	18654	99999	99999	0.469	0.003	99999	99999	0.384	0.003	5.225	0.021	5.96	0.061
99999	18683	99999	99999	0.432	0.003	99999	99999	0.335	0.003	4.606	0.019	5.842	0.06
99999	18604.5	99999	99999	0.497	0.004	99999	99999	0.51	0.004	7.098	0.029	6.753	0.069
99999	18628	99999	99999	0.512	0.004	99999	99999	0.552	0.005	7.881	0.032	6.9	0.071
99999	18500	99999	99999	0.517	0.003	99999	99999	0.551	0.003	7.999	0.114	6.923	0.034
99999	18732	99999	99999	0.444	0.009	99999	99999	0.353	0.009	4.937	0.048	5.962	0.083
99999	18686	99999	99999	0.511	0.005	99999	99999	0.549	0.03	7.852	0.105	6.886	0.076
99999	18020.5	99999	99999	0.475	0.004	99999	99999	0.427	0.023	6.003	0.08	6.241	0.069
99999	18012.5	99999	99999	0.44	0.004	99999	99999	0.335	0.018	4.699	0.063	5.778	0.064
99999	16258.615	99999	99999	0.437	0.004	99999	99999	0.333	0.018	4.689	0.063	5.813	0.064
99999	17990	99999	99999	0.413	0.004	99999	99999	0.298	0.016	4.058	0.054	5.491	0.061
99999	18044.5	99999	99999	0.44	0.004	99999	99999	0.344	0.019	4.935	0.066	5.889	0.065
99999	17034.495	99999	99999	0.452	0.004	99999	99999	0.345	0.005	4.747	0.051	5.814	0.012
99999	16851.5	99999	99999	0.485	0.004	99999	99999	0.454	0.007	6.472	0.07	6.427	0.013
99999	17570	99999	99999	0.464	0.004	99999	99999	0.43	0.006	6.027	0.065	6.329	0.013
99999	16763.64	99999	99999	0.435	0.004	99999	99999	0.331	0.005	4.739	0.051	5.816	0.012
99999	14691.635	99999	99999	0.419	0.004	99999	99999	0.294	0.004	4.074	0.044	5.62	0.011
99999	15577	99999	99999	0.42	0.004	99999	99999	0.291	0.004	4.096	0.044	5.608	0.011
99999	15033.58	99999	99999	0.44	0.004	99999	99999	0.34	0.005	4.805	0.052	5.797	0.012
99999	13606.05	99999	99999	0.497	0.004	99999	99999	0.518	0.008	7.513	0.081	6.758	0.014
99999	12962	99999	99999	0.505	0.004	99999	99999	0.54	0.008	7.813	0.084	6.919	0.014
99999	13972.5	99999	99999	0.516	0.004	99999	99999	0.519	0.008	7.353	0.079	6.71	0.014
99999	9995.995	99999	99999	0.433	0.004	99999	99999	0.315	0.005	4.411	0.048	5.686	0.012
99999	10048.5	99999	99999	0.455	0.004	99999	99999	0.34	0.005	4.799	0.052	5.696	0.012
