# Supplementary material for: Evaluation of stratospheric age of air from CF 4 , C 2 F 6 , C 3 F 8 , CHF 3 , HFC-125, HFC-227ea and SF 6 ; implications for the calculations of halocarbon lifetimes, fractional release factors and ozone depletion potentials
Source: Copernicus journal article supplement (doi:10.5194/acp-18-3369-2018), 2018-03-08
Supplement: Supplementary file 2 [file acp-18-3369-2018-supplement.zip › Leedham Elvidge supplement/UEA_CapeGrim_C2F6.na.txt]

20	1001
file	prepared	by	Emma	Elvidge	e.leedham-elvidge@uea.ac.uk
School	of	Environmental	Sciences,	University	of	East	Anglia,	Norwich,	NR47TJ
merged	UEA	Cape	Grim	flask	analysis	archive
1	1
1978	4	26	2017	8	4
0
time	decimal	years
2
1	1
99999	99999
C2F6_ppt	(ppt)
C2F6_err	(ppt)
0
4
All	mixing	ratios	given	in	this	data	file	based	on	UEA	scale	as	of	07-Jul-15
Atmospheric	measurements	of	C2F6	measured	in	UEA	flasks	collected	by	CSIRO
Flasks	collected	at	Cape	Grim	station
Flasks	analysed	at	UEA	by	gas	chromatography	with	mass	spectrometry	detection	(AutoSpec).
dataset	maintained	by	Johannes	Laube	j.laube@uea.ac.uk
date	C2F6_ppt	C2F6_err
1978.3212	0.7876	0.045
1978.5192	0.7826	0.045
1978.8322	0.7805	0.017
1979.0998	0.7901	0.017
1980.6546	0.925	0.019
1982.1463	1.0443	0.018
1982.4046	1.0816	0.002
1983.5861	1.1632	0.018
1985.6053	1.2978	0.044
1986.0998	1.3399	0.044
1986.8662	1.4184	0.018
1987.0219	1.4534	0.005
1987.0247	1.4142	0.01
1987.41	1.4221	0.027
1988.4742	1.5846	0.027
1989.3048	1.5617	0.028
1990.966	1.7183	0.053
1991.2023	1.7347	0.059
1991.4687	1.7901	0.125
1991.511	1.7811	0.002
1992.0438	1.8335	0.005
1992.1162	1.839	0.016
1992.2719	1.8251	0.011
1992.5055	1.8383	0.037
1992.7297	1.8964	0.034
1992.7324	1.8745	0.034
1993.4358	1.9252	0.036
1993.4961	1.9421	0.035
1993.6135	1.9177	0.038
1993.7215	1.9592	0.034
1994.1135	2.0022	0.034
1994.2078	2.0941	0.034
1994.324	1.9872	0.034
1994.4194	2.0062	0.034
1994.4413	2.0349	0.045
1994.9358	2.0027	0.046
1995.1053	2.0632	0.047
1995.2023	2.0946	0.047
1995.2829	2.0749	0.144
1995.4523	2.0462	0.047
1995.6463	2.2183	0.055
1995.8963	2.1783	0.059
1996.108	2.1221	0.055
1996.261	2.1441	0.056
1996.41	2.213	0.046
1996.6409	2.2129	0.046
1996.8881	2.2009	0.017
1997.0192	2.197	0.02
1997.1546	2.1839	0.014
1997.4155	2.2741	0.015
1997.5411	2.2561	0.016
1998.1804	2.3336	0.017
1998.3881	2.3744	0.022
1998.4605	2.3996	0.029
1998.6628	2.3785	0.02
1998.7324	2.41	0.024
1998.7911	2.3935	0.101
1998.9073	2.394	0.019
1999.1299	2.4349	0.028
1999.1776	2.4329	0.045
1999.2856	2.4948	0.018
1999.3689	2.4849	0.019
1999.4742	2.4939	0.025
1999.6272	2.4861	0.028
1999.7324	2.4755	0.022
1999.7993	2.5023	0.019
1999.8744	2.4997	0.028
1999.9632	2.4915	0.018
2000.0548	2.4708	0.019
2000.1463	2.55	0.033
2001.324	2.6895	0.021
2001.4578	2.7328	0.026
2001.5411	2.7327	0.026
2001.6053	2.7181	0.026
2001.6776	2.7016	0.028
2001.7993	2.7294	0.731
2001.8689	2.7259	0.026
2001.9468	2.7218	0.029
2003.0575	2.8424	0.048
2003.2023	2.8313	0.049
2003.2911	2.8677	0.048
2003.3909	2.8684	0.057
2003.716	2.9519	0.049
2003.7719	2.9686	0.058
2003.9523	2.9119	0.29
2004.0411	2.8858	0.125
2004.3854	2.9796	0.058
2004.4989	2.9693	0.08
2004.5998	3.0144	0.058
2004.6694	3.0572	0.007
2005.0466	3.1106	0.007
2005.2664	3.0912	0.09
2005.9304	3.1215	0.025
2006.1107	3.1096	0.133
2006.1381	3.1514	0.025
2006.6463	3.2443	0.116
2006.9468	3.2268	0.098
2007.4715	3.2843	0.004
2007.7215	3.3375	0.026
2008.4523	3.3533	0.004
2009.1831	3.4243	0.026
2010.9441	3.5648	0.005
2011.4046	3.582	0.036
2011.4742	3.618	0.036
2012.324	3.6642	0.021
2012.9276	3.715	0.024
2013.205	3.7022	0.023
2013.5137	3.7273	0.021
2013.7884	3.7488	0.006
2014.1409	3.7427	0.018
2014.347	3.7751	0.024
2014.5466	3.7614	0.026
2014.6968	3.7907	0.003
2014.8607	3.7783	0.025
