# Supplementary material for: Evaluation of stratospheric age of air from CF 4 , C 2 F 6 , C 3 F 8 , CHF 3 , HFC-125, HFC-227ea and SF 6 ; implications for the calculations of halocarbon lifetimes, fractional release factors and ozone depletion potentials
Source: Copernicus journal article supplement (doi:10.5194/acp-18-3369-2018), 2018-03-08
Supplement: Supplementary file 2 [file acp-18-3369-2018-supplement.zip › Leedham Elvidge supplement/UEA_CapeGrim_C3F8.na.txt]

20	1001
file	prepared	by	Emma	Elvidge	e.leedham-elvidge@uea.ac.uk
School	of	Environmental	Sciences,	University	of	East	Anglia,	Norwich,	NR47TJ
merged	UEA	Cape	Grim	flask	analysis	archive
1	1
1978	4	26	2017	8	4
0
time	decimal	years
2
1	1
99999	99999
C3F8_ppt	(ppt)
C3F8_err	(ppt)
0
5
All	mixing	ratios	given	in	this	data	file	based	on	UEA	scale	as	of	07-Jul-15
Atmospheric	measurements	of	C3F8	measured	in	UEA	flasks	collected	by	CSIRO
Flasks	collected	at	Cape	Grim	station
Flasks	analysed	at	UEA	by	gas	chromatography	with	mass	spectrometry	detection	(AutoSpec).
dataset	maintained	by	Johannes	Laube	j.laube@uea.ac.uk
date	C3F8_ppt	C3F8_err
1978.5192	0.0239	0.0023
1980.7379	0.0342	0.0023
1983.5861	0.0471	0.0004
1985.6053	0.0599	0.0005
1987.0247	0.0735	0.0008
1987.41	0.0738	0.0005
1989.3048	0.0853	0.0026
1990.966	0.1003	0.0029
1991.2023	0.0973	0.0026
1993.4358	0.1141	0.0027
1995.4523	0.1389	0.0055
1997.0192	0.1522	0.0055
1999.4742	0.2086	0.0056
2000.1463	0.227	0.0098
2001.324	0.2623	0.0101
2001.9468	0.2805	0.0099
2003.3909	0.3312	0.006
2004.4989	0.3707	0.0047
2004.9605	0.3765	0.004
2005.0466	0.3872	0.0069
2005.1107	0.3944	0.0065
2005.2664	0.3806	0.0068
2005.7582	0.3966	0.0052
2006.1381	0.414	0.0062
2006.9468	0.4301	0.0063
2007.5137	0.4493	0.0062
2007.7215	0.4572	0.007
2008.4523	0.4695	0.0058
2009.1831	0.4839	0.0048
2009.574	0.4928	0.0032
2010.9441	0.5168	0.0043
2012.324	0.5483	0.0065
2012.6655	0.5481	0.0069
2012.9276	0.5565	0.0074
