# Supplementary material for: Evaluation of stratospheric age of air from CF 4 , C 2 F 6 , C 3 F 8 , CHF 3 , HFC-125, HFC-227ea and SF 6 ; implications for the calculations of halocarbon lifetimes, fractional release factors and ozone depletion potentials
Source: Copernicus journal article supplement (doi:10.5194/acp-18-3369-2018), 2018-03-08
Supplement: Supplementary file 2 [file acp-18-3369-2018-supplement.zip › Leedham Elvidge supplement/UEA_CapeGrim_CHF3.na.txt]

20	1001
file	prepared	by	Emma	Elvidge	e.leedham-elvidge@uea.ac.uk
School	of	Environmental	Sciences,	University	of	East	Anglia,	Norwich,	NR47TJ
merged	UEA	Cape	Grim	flask	analysis	archive
1	1
1978	4	26	2017	8	4
0
time	decimal	years
2
1	1
99999	99999
CHF3_ppt	(ppt)
CHF3_err	(ppt)
0
5
All	mixing	ratios	given	in	this	data	file	based	on	UEA	scale	as	of	07-Jul-15
Atmospheric	measurements	of	CHF3	measured	in	UEA	flasks	collected	by	CSIRO
Flasks	collected	at	Cape	Grim	station
Flasks	analysed	at	UEA	by	gas	chromatography	with	mass	spectrometry	detection	(AutoSpec).
dataset	maintained	by	Johannes	Laube	j.laube@uea.ac.uk
date	CHF3_ppt	CHF3_err
1978.3212	3.2114	0.1897
1978.5192	2.8962	0.0776
1978.8322	3.1074	0.0776
1979.0998	3.4768	0.3393
1979.1217	3.1549	0.0195
1980.7379	4.4552	0.3024
1982.1463	4.5369	0.2892
1982.4046	4.9583	0.0669
1983.5861	4.6416	0.0669
1985.6053	5.5805	0.2186
1986.0998	5.7663	0.318
1986.8662	6.2736	0.318
1987.0219	7.0533	0.0266
1987.0247	6.2743	0.0601
1987.41	6.3718	0.1345
1988.4742	6.7459	0.1022
1989.3048	7.1814	0.1249
1990.4018	8.0726	0.1249
1990.966	8.4167	0.2832
1991.2023	8.2015	0.0765
1991.4687	8.6669	0.0765
1991.511	8.8703	0.0765
1992.0438	8.6963	0.2425
1992.1162	9.076	0.2425
1992.2719	9.1115	0.2425
1992.5055	9.1415	0.2426
1992.7297	9.3223	0.2426
1992.7324	9.3065	0.0861
1993.4358	9.5166	0.0854
1993.4961	9.885	0.326
1993.6135	9.5551	0.3261
1993.7215	9.6997	0.1441
1994.1135	10.0303	0.1439
1994.2078	9.7178	0.1441
1994.324	10.0387	0.1439
1994.4194	10.1585	0.1439
1994.4413	9.8737	0.144
1994.7637	10.2331	0.144
1994.9358	10.432	0.1304
1995.1053	10.3822	0.1299
1995.2023	10.8342	0.13
1995.2829	10.4433	0.1299
1995.4523	11.0485	0.1512
1995.8963	11.1054	0.1513
1996.108	11.458	0.1514
1996.261	11.5687	0.0971
1996.41	11.4682	0.097
1996.6409	11.9958	0.0972
1996.8881	11.9552	0.1007
1997.0192	12.1618	0.1014
1997.1546	12.145	0.1011
1997.4155	12.4795	0.1006
1997.5411	12.6716	0.1013
1998.1804	13.0083	0.1049
1998.2911	13.3405	0.1013
1998.7911	14.0727	0.1164
1999.1299	14.2309	0.1187
1999.1776	14.5225	0.1164
1999.2856	14.2151	0.1165
1999.369	14.6842	0.1674
1999.4742	14.4899	0.1182
1999.6272	14.7485	0.1195
1999.7324	15.205	0.1166
1999.7993	14.6694	0.1163
1999.8744	15.1372	0.1165
1999.9632	14.823	0.7165
2000.0548	14.6987	0.7165
2000.1463	14.6739	0.7171
2000.7461	14.9846	0.7307
2001.324	16.185	0.7165
2001.4578	16.1406	0.2217
2001.5411	16.474	0.2215
2001.6053	16.8706	0.2323
2001.6776	16.1157	0.223
2001.7993	16.4457	0.2219
2001.869	16.8073	0.2225
2001.9468	16.6129	0.2216
2002.4715	16.4566	0.2895
2003.0575	17.196	0.2454
2003.2023	17.5056	0.2436
2003.2911	17.2005	0.243
2003.3909	17.365	0.4004
2003.716	17.6535	0.0491
2003.7719	17.7836	0.0503
2003.9523	17.5237	0.6829
2004.0411	18.1776	0.6828
2004.3854	18.2582	0.6836
2004.4989	18.2762	0.5175
2004.5998	18.7282	0.1341
2004.6694	18.1033	0.1054
2005.0466	19.6818	0.3984
2005.1107	18.2758	0.011
2005.2664	18.9595	0.8228
2005.9304	19.6676	0.8164
2006.1107	19.4272	0.7978
2006.1381	19.5229	0.3966
2006.6463	19.8885	0.2923
2006.9468	20.9081	0.4162
2007.4715	20.9057	0.1422
2007.5137	20.671	0.1509
2007.7215	21.6718	0.4464
2008.4523	21.9153	0.3863
2009.1831	22.7422	0.5337
2009.574	22.8566	0.083
2010.9441	24.0839	0.256
2012.324	25.748	0.4755
2012.6655	25.5546	0.4078
2012.9276	26.3835	0.786
2013.205	26.678	0.2343
2013.5137	26.5903	0.2584
2013.7884	26.893	0.2205
2014.1409	27.2361	0.2208
2014.347	27.5781	0.243
2014.5466	27.8315	0.3071
2014.6968	27.9797	0.248
2014.8607	28.0775	0.3838
