# Supplementary material for: Evaluation of stratospheric age of air from CF 4 , C 2 F 6 , C 3 F 8 , CHF 3 , HFC-125, HFC-227ea and SF 6 ; implications for the calculations of halocarbon lifetimes, fractional release factors and ozone depletion potentials
Source: Copernicus journal article supplement (doi:10.5194/acp-18-3369-2018), 2018-03-08
Supplement: Supplementary file 2 [file acp-18-3369-2018-supplement.zip › Leedham Elvidge supplement/UEA_CapeGrim_HFC125.na.txt]

20	1001
file	prepared	by	Emma	Elvidge	e.leedham-elvidge@uea.ac.uk
School	of	Environmental	Sciences,	University	of	East	Anglia,	Norwich,	NR47TJ
merged	UEA	Cape	Grim	flask	analysis	archive
1	1
1978	4	26	2017	8	4
0
time	decimal	years
2
1	1
99999	99999
HFC125_ppt	(ppt)
HFC125_err	(ppt)
0
5
All	mixing	ratios	given	in	this	data	file	based	on	UEA	scale	as	of	07-Jul-2015
Atmospheric	measurements	of	HFC125	measured	in	UEA	flasks	collected	by	CSIRO
Flasks	collected	at	Cape	Grim	station
Flasks	analysed	at	UEA	by	gas	chromatography	with	mass	spectrometry	detection	(AutoSpec).
dataset	maintained	by	Johannes	Laube	j.laube@uea.ac.uk
date	HFC125_ppt	HFC125_err
1978.3212	0.0345	0.0024
1978.5192	0.0350	0.0025
1979.0998	0.0229	0.0016
1983.5861	0.0469	0.0129
1985.6053	0.0530	0.0137
1987.4100	0.0426	0.0110
1989.3048	0.0748	0.0029
1991.2023	0.0435	0.0017
1993.4358	0.0619	0.0102
1993.4961	0.0660	0.0109
1994.1135	0.0825	0.0137
1995.4523	0.1306	0.0004
1997.0192	0.2944	0.0015
1998.2911	0.5361	0.0012
1999.4742	0.9577	0.0049
2000.7461	1.1854	0.0137
2001.3240	1.5062	0.0077
2002.4715	1.8077	0.0228
2003.3909	2.2683	0.0163
2004.6694	2.9096	0.0336
2005.1107	3.1366	0.0298
2005.2664	3.2506	0.0350
2006.6463	4.1295	0.0639
2007.5137	4.9100	0.0564
2008.4523	5.7130	0.0751
2009.1831	6.4245	0.0518
2009.5740	6.8285	0.0071
2010.9441	8.4571	0.0524
2011.1053	8.9818	0.2015
2011.2132	8.9581	0.1816
2011.3048	9.4276	0.1911
2011.4046	9.6059	0.2118
2011.4742	9.5206	0.0828
2012.3240	10.6218	0.0927
2012.6655	11.0732	0.0966
2012.9276	11.5069	0.0766
2013.2050	12.0902	0.0800
2013.5137	12.7567	0.1495
2013.7884	13.2171	0.1549
2014.1409	13.6876	0.1604
