# Supplementary material for: Evaluation of stratospheric age of air from CF 4 , C 2 F 6 , C 3 F 8 , CHF 3 , HFC-125, HFC-227ea and SF 6 ; implications for the calculations of halocarbon lifetimes, fractional release factors and ozone depletion potentials
Source: Copernicus journal article supplement (doi:10.5194/acp-18-3369-2018), 2018-03-08
Supplement: Supplementary file 2 [file acp-18-3369-2018-supplement.zip › Leedham Elvidge supplement/UEA_CapeGrim_HFC227ea.na.txt]

20	1001
file	prepared	by	Emma	Elvidge	e.leedham-elvidge@uea.ac.uk
School	of	Environmental	Sciences,	University	of	East	Anglia,	Norwich,	NR47TJ
merged	UEA	Cape	Grim	flask	analysis	archive
1	1
1978	4	26	2017	8	4
0
time	decimal	years
2
1	1
99999	99999
HFC227ea_ppt	(ppt)
HFC227ea_err	(ppt)
0
5
All	mixing	ratios	given	in	this	data	file	based	on	UEA	scale	as	of	07-Jul-15
Atmospheric	measurements	of	HFC227ea	measured	in	UEA	flasks	collected	by	CSIRO
Flasks	collected	at	Cape	Grim	station
Flasks	analysed	at	UEA	by	gas	chromatography	with	mass	spectrometry	detection	(AutoSpec).
dataset	maintained	by	Johannes	Laube	j.laube@uea.ac.uk
date	HFC227ea_ppt	HFC227ea_err
1978.3212	0.018	0.0015
1978.5192	0.0232	0.0019
1983.5861	0.0225	0.0018
1987.41	0.0253	0.001
1989.3048	0.0227	0.0003
1991.2023	0.0266	0.0019
1993.4358	0.0329	0.0006
1993.4961	0.0369	0.0006
1995.4523	0.0416	0.0034
1997.0192	0.0478	0.0007
1998.2911	0.0657	0.0008
1999.4742	0.0855	0.0011
2000.1463	0.1198	0.0007
2000.7461	0.103	0.0029
2002.4715	0.1486	0.0043
2003.3909	0.1785	0.0018
2004.4989	0.244	0.0026
2004.6694	0.2515	0.0447
2004.9605	0.261	0.0008
2005.1107	0.2523	0.003
2005.2664	0.2526	0.0029
2005.7582	0.2802	0.0009
2006.6463	0.3389	0.0092
2007.5137	0.3601	0.0091
2008.4523	0.4543	0.016
2013.205	0.7586	0.0052
2013.5137	0.8045	0.0265
2013.7884	0.8224	0.0271
2014.1409	0.8344	0.0275
