# Supplementary material for: Evaluation of stratospheric age of air from CF 4 , C 2 F 6 , C 3 F 8 , CHF 3 , HFC-125, HFC-227ea and SF 6 ; implications for the calculations of halocarbon lifetimes, fractional release factors and ozone depletion potentials
Source: Copernicus journal article supplement (doi:10.5194/acp-18-3369-2018), 2018-03-08
Supplement: Supplementary file 2 [file acp-18-3369-2018-supplement.zip › Leedham Elvidge supplement/UEA_CapeGrim_SF6.na.txt]

20	1001
file	prepared	by	Emma	Elvidge	e.leedham-elvidge@uea.ac.uk
School	of	Environmental	Sciences,	University	of	East	Anglia,	Norwich,	NR47TJ
merged	UEA	Cape	Grim	flask	analysis	archive
1	1
1978	4	26	2017	8	4
0
time	decimal	years
2
1	1
99999	99999
SF6_ppt	(ppt)
SF6_err	(ppt)
0
5
All	mixing	ratios	given	in	this	data	file	based	on	UEA	scale	as	of	07-Jul-15
Atmospheric	measurements	of	SF6	measured	in	UEA	flasks	collected	by	CSIRO
Flasks	collected	at	Cape	Grim	station
Flasks	analysed	at	UEA	by	gas	chromatography	with	mass	spectrometry	detection	(AutoSpec).
dataset	maintained	by	Johannes	Laube	j.laube@uea.ac.uk
date	SF6_ppt	SF6_err
1978.3212	0.5564	0.0077
1978.5192	0.568	0.0068
1979.0998	0.6322	0.0022
1980.7379	0.756	0.0019
1983.5861	1.1016	0.0084
1985.6053	1.3679	0.0088
1987.0247	1.6029	0.0075
1987.41	1.6848	0.0075
1988.4742	1.8602	0.0139
1989.3048	2.0121	0.0072
1990.966	2.3484	0.0102
1991.2023	2.3226	0.0079
1992.2719	2.5767	0.0337
1993.4358	2.7853	0.0081
1994.1135	2.942	0.0787
1995.4523	3.2969	0.0099
1996.41	3.4744	0.0278
1997.0192	3.6084	0.0215
1999.3689	4.1823	0.0552
1999.4742	4.209	0.0528
2000.1463	4.3714	0.1537
2000.7461	4.4032	0.1725
2001.324	4.6013	0.038
2001.5411	4.6874	0.0333
2001.9468	4.7291	0.0275
2002.4715	4.8242	0.1021
2003.3909	5.0532	0.0547
2003.716	5.1702	0.0603
2004.4989	5.2747	0.0489
2004.6694	5.3257	0.1095
2004.9605	5.477	0.0612
2005.0466	5.4634	0.0312
2005.1107	5.421	0.0289
2005.2664	5.4465	0.0222
2005.7582	5.5964	0.0353
2005.9304	5.5714	0.05
2006.1107	5.564	0.1208
2006.1381	5.6346	0.1143
2006.6463	5.7217	0.1544
2006.9468	5.8293	0.1182
2007.4715	6.0086	0.0339
2007.5137	5.9657	0.0326
2007.7215	6.0839	0.0304
2008.4523	6.2151	0.1165
2009.1831	6.4823	0.0444
2009.574	6.5838	0.0275
2010.9441	6.9975	0.0701
2011.2132	7.0208	0.1438
2011.4046	7.1244	0.0839
2011.4742	7.1755	0.0254
2012.324	7.4162	0.0644
2012.6655	7.4567	0.0501
2012.9276	7.5654	0.0508
2013.205	7.6819	0.0431
2013.5137	7.7723	0.0294
2013.7884	7.8887	0.0441
2014.1409	7.9049	0.007
2014.347	8.0045	0.0742
2014.5466	7.9904	0.1349
2014.6968	8.1278	0.081
2014.8607	8.1152	0.0699
2015.3607	3.7783	0.025
